# Supplementary material for: Wider Potential Windows of Cellulose Multiwall Carbon Nanotube Fibers Leading to Qualitative Multifunctional Changes in an Organic Electrolyte
Source: MDPI journal article supplement (doi:10.3390/polym13244439), 2021-12-17
Supplement: s1 [file s1]

Supplementary

# Wider Potential Windows of Cellulose Multiwall Carbon Nanotube Fibers Leading to Qualitative Multifunctional Changes in an Organic Electrolyte

Rudolf Kiefer <sup>1,\*</sup>, Fred Elhi <sup>2</sup>, Anna-Liisa Peikolainen <sup>2</sup> and Tarmo Tamm <sup>2</sup>

<sup>1</sup> Conducting Polymers in Composites and Applications Research Group, Faculty of Applied Sciences, Ton Duc Thang University, Ho Chi Minh City 700000, Vietnam

<sup>2</sup> Intelligent Materials and Systems Lab, Institute of Technology, University of Tartu, Nooruse 1, 50411 Tartu, Estonia; elhi.fred@gmail.com (F.E.); anna.liisa.peikolainen@ut.ee (A.-L.P.); tarmo.tamm@ut.ee (T.T.)

\* Corresponding: rudolf.kiefer@tdtu.edu.vn; Tel: +886-905-60-55-15

**Citation:** Kiefer, R.; Elhi, F.; Peikolainen, A.-L.; Tamm, T. Wider Potential Windows of Cellulose Multiwall Carbon Nanotube Fibers Leading to Qualitative Multifunctional Changes in an Organic Electrolyte. *Polymers* **2021**, *13*, x.

<https://doi.org/10.3390/xxxxx>

Academic Editor(s): Francisco Javier Espinach Orús and Quim Tarrés Farés

Received: 5 November 2021

Accepted: 13 December 2021

Published:

**Publisher's Note:** MDPI stays neutral with regard to jurisdictional claims in published maps and institutional affiliations.

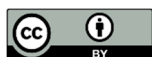

**Copyright:** © 2021 by the authors. Submitted for possible open access publication under the terms and conditions of the Creative Commons Attribution (CC BY) license (<https://creativecommons.org/licenses/by/4.0/>).

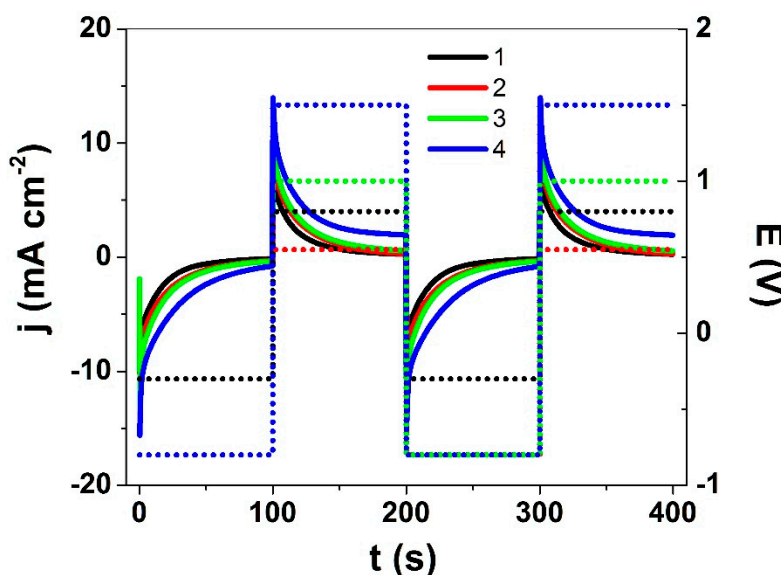

**Figure S1.** Current density time curves at frequency 0.005Hz of Cell-CNT fiber in LiTFSI-PC electrolyte applied at different potential range 1 (0.8V to -0.3V, black curve), potential range 2 (0.55V to -0.8V, red curve), potential range 3 (1.0V to -0.8V, green curve) and potential range 4 (1.5V to -0.8V, blue curve).

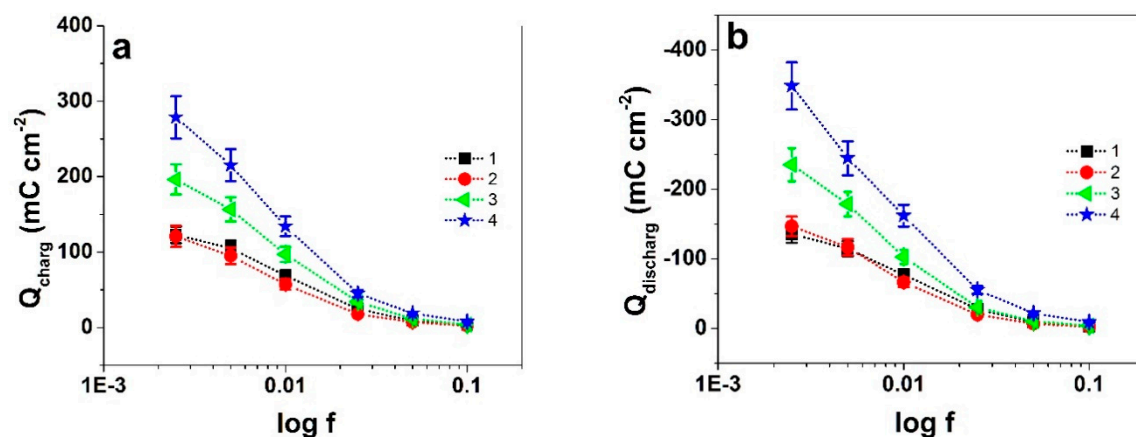

**Figure S2.** Square wave steps of Cell-CNT fibres in LiTFSI-PC electrolyte at different potential ranges 1-4 with 1 (0.8V to -0.3V,  $\cdots \blacksquare \cdots$ ), 2 (0.55V to -0.8V,  $\cdots \bullet \cdots$ ), 3 (1.0V to -0.8V,  $\cdots \blacktriangle \cdots$ ) and 4 (1.5V to -0.8V,  $\cdots \star \cdots$ ) showing in a: charge densities at positive charging  $Q_{\text{charge}}$  and in b: charge densities at negative charging  $Q_{\text{discharge}}$  against a logarithmic scale of frequencies (0.0025Hz -0.1Hz).

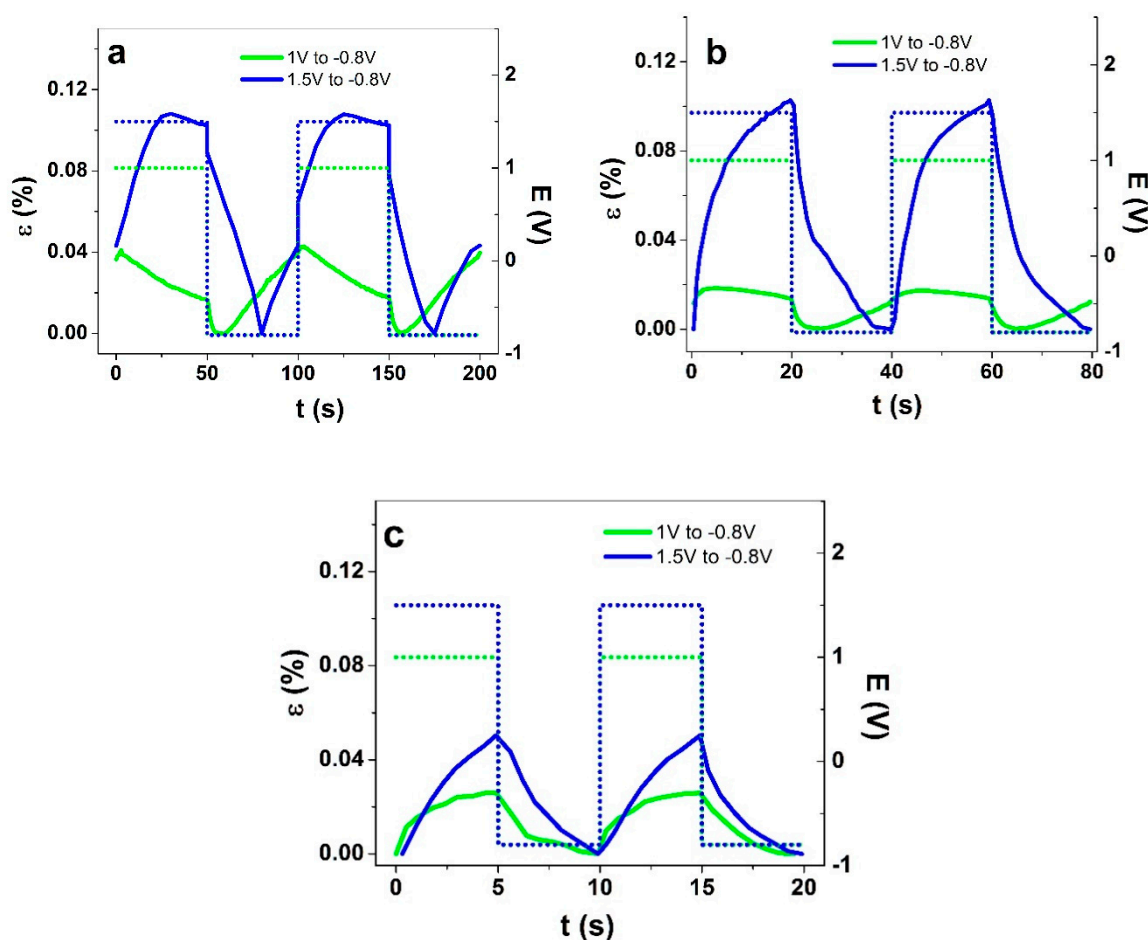

**Figure S3.** Square wave steps of Cell-CNT fibers in a potential range 3 (green curve) and potential range 4 (blue curve) showing strain  $\epsilon$  of two subsequent cycles (3<sup>rd</sup> to 4<sup>th</sup>) against time  $t$  at different frequencies in a: 10mHz, b: 25mHz and c: 0.1Hz.
